# Supplementary material for: Social gradient in health-related quality of life among urban middle-age residents in Limassol, Cyprus: research article
Source: Springer Nature journal article supplement (doi:10.1186/s12889-020-10027-6), 2021-03-29
Supplement: MOESM1 [file 12889_2020_10027_MOESM1_ESM.pdf]

## Appendix 1

### Demographic / socio-economic characteristics questionnaire

|           |                                 |                          |                                                             |                          |                               |
|-----------|---------------------------------|--------------------------|-------------------------------------------------------------|--------------------------|-------------------------------|
| <b>1.</b> | Gender                          | <input type="checkbox"/> | <input type="checkbox"/>                                    | <b>2.</b> Age            | ..... years                   |
|           |                                 | Male                     | Female                                                      |                          |                               |
| <b>3.</b> | Nationality                     | <input type="checkbox"/> | <input type="checkbox"/>                                    | Other .....              |                               |
|           |                                 | Cypriot                  |                                                             |                          |                               |
| <b>4.</b> | Marital status                  | <input type="checkbox"/> | <input type="checkbox"/>                                    | <input type="checkbox"/> | <input type="checkbox"/>      |
|           |                                 | Married                  | Single                                                      | Divorced/<br>Separated   | Widow    In cohabitation      |
| <b>5.</b> | Total number of family children | .....                    | <b>6.</b> Number of family members living in the same house |                          | .....                         |
|           |                                 | Children                 |                                                             |                          | people                        |
| <b>7.</b> | Education                       | <input type="checkbox"/> | <input type="checkbox"/>                                    | <input type="checkbox"/> | <input type="checkbox"/>      |
|           |                                 | None                     | Primary                                                     | Secondary-Lower          | Secondary-Upper               |
|           |                                 |                          |                                                             |                          | Undergraduate    Postgraduate |
| <b>8.</b> | Employment status               | <input type="checkbox"/> | <input type="checkbox"/>                                    | <input type="checkbox"/> | <input type="checkbox"/>      |
|           |                                 | Full time                | Part time                                                   | Unemployed               | I do not work                 |
|           |                                 |                          |                                                             |                          | <b>9.</b> Occupation          |
|           |                                 |                          |                                                             |                          | .....                         |

|                                                                                                                                                              |                          |                          |                                                |                                                |                          |                          |                          |
|--------------------------------------------------------------------------------------------------------------------------------------------------------------|--------------------------|--------------------------|------------------------------------------------|------------------------------------------------|--------------------------|--------------------------|--------------------------|
| <b>10.</b> Family net monthly income                                                                                                                         | <input type="checkbox"/> | <input type="checkbox"/> | <input type="checkbox"/>                       | <input type="checkbox"/>                       | <input type="checkbox"/> | <input type="checkbox"/> | <input type="checkbox"/> |
|                                                                                                                                                              | <1000                    | 1001-1500                | 1501-2000                                      | 2001-2500                                      | 2501-3001                | 3001-5000                | 5001 και άνω             |
| <b>11.</b> In the last 12 months, have you had any difficulties with the household's current expenses, such as paying bills, buying basic necessities, etc.? |                          |                          |                                                |                                                |                          | <input type="checkbox"/> | <input type="checkbox"/> |
|                                                                                                                                                              |                          |                          |                                                |                                                |                          | Yes                      | 'No                      |
| <b>12.</b> How long have you been living at this address?                                                                                                    | <input type="checkbox"/> | <input type="checkbox"/> | <input type="checkbox"/>                       | <input type="checkbox"/>                       | <input type="checkbox"/> |                          |                          |
|                                                                                                                                                              | Less than 1 year         | 1-3 years                | 3-5 years                                      | 5-10 years                                     | Over 10 years            |                          |                          |
| <b>13.</b> Do you live in a privately owned or rented house?                                                                                                 | <input type="checkbox"/> | <input type="checkbox"/> | <input type="checkbox"/>                       |                                                |                          |                          |                          |
|                                                                                                                                                              | Owed                     | Rented                   | Other .....                                    |                                                |                          |                          |                          |
| <b>14.</b> House type                                                                                                                                        | <input type="checkbox"/> | <input type="checkbox"/> | <input type="checkbox"/>                       | <input type="checkbox"/>                       |                          |                          |                          |
|                                                                                                                                                              | Detached house           | Semi-detached house      | Apartment building with less than 8 apartments | Apartment building with over than 8 apartments |                          |                          |                          |

**15. How would you self-rate your general state of health?**

|                          |           |
|--------------------------|-----------|
| <input type="checkbox"/> | Excellent |
| <input type="checkbox"/> | Very good |
| <input type="checkbox"/> | Good      |
| <input type="checkbox"/> | Moderate  |

|  |      |
|--|------|
|  | Poor |
|--|------|

16. Do you smoke; Yes  No

**16.1. If you answered YES above, please answer the questions below**

How many years do you smoke? .....

About how many cigarettes do you smoke a day?.....

**16.2. If you answered NO, please answer the questions below**

Have you been smoking in the past? Yes  NO

YES, for how many years in total did you smoke? .....

How many cigarettes did you smoke a day? .....

**17. Alcohol: in the last 12 months, how often have you consumed alcohol (beer, wine, alcoholic beverages, a cocktail containing alcohol)?**

|  |                    |  |                            |
|--|--------------------|--|----------------------------|
|  | Everyday           |  | 2-3 per month              |
|  | 5-6 times per week |  | Once per month             |
|  | 3-4 times per week |  | 3- 11 times per year       |
|  | 2 times per week   |  | Less than 2 times per year |
|  | Once per week      |  | Never                      |

Think of a typical day to drink: approximately how many alcoholic beverages do you consume?

1 drink   2 drinks                      3-4 drinks                      5-6 drink                      7-9 drinks                      over 10 drinks
